# Supplementary material for: Associations Between Built Environment Factors and SARS-CoV-2 Infections at the Neighbourhood Level in a Metropolitan Area in Germany
Source: Springer Nature journal article supplement (doi:10.1007/s11524-022-00708-5), 2023-01-12
Supplement: MOESM1 [file 11524_2022_708_MOESM1_ESM.pdf]

Associations between built environment factors and  
SARS-CoV-2 infections at the neighbourhood-level in  
a metropolitan area in Germany

**Supplementary material**

Supplementary material:  
*Associations between built environment factors and SARS-CoV-2 infections at the  
 neighbourhood-level in a metropolitan area in Germany*

7-Day Incidence between Essen (normalized) and UK Essen ( $R^2 = 0.91$ )

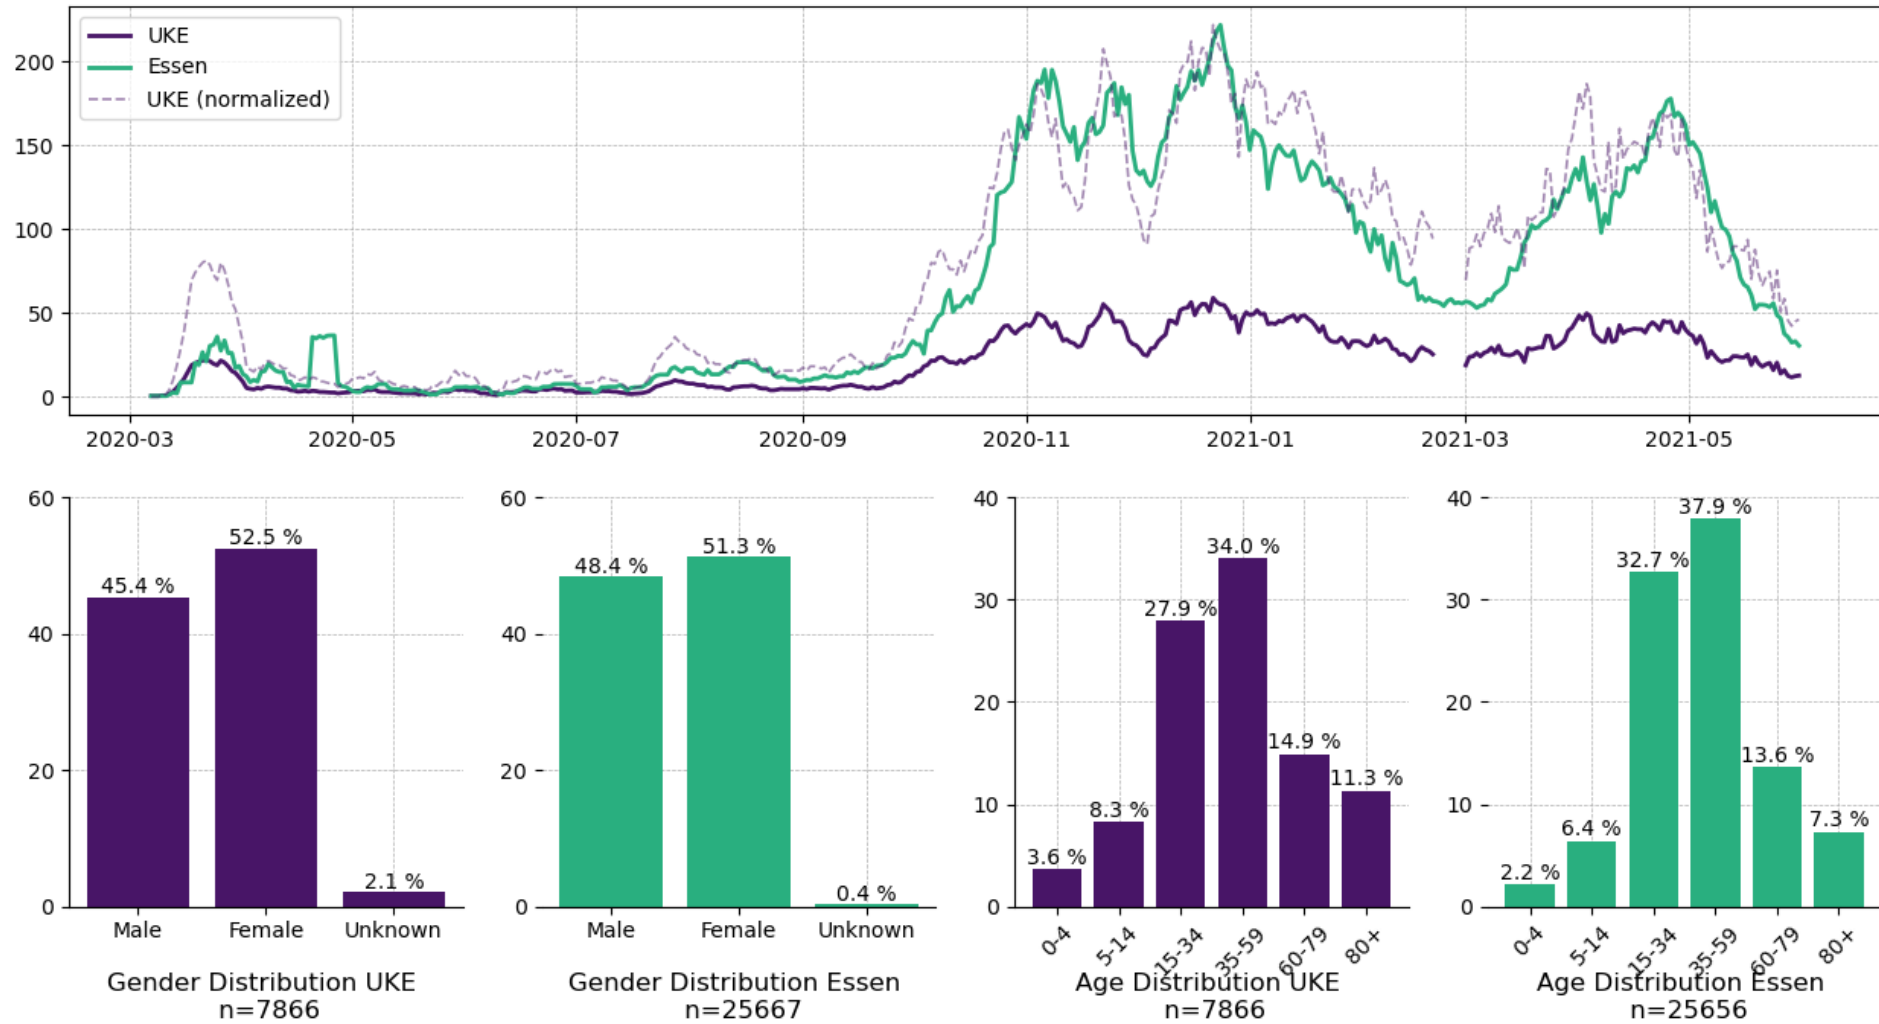

**Figure A.** Comparison of UME dataset to officially reported data for the city of Essen by the Robert Koch Institute

Supplementary material:  
Associations between built environment factors and SARS-CoV-2 infections at the  
neighbourhood-level in a metropolitan area in Germany

**Table A.** List of all demographic, socio-economic and built environment variables at the neighbourhood level with their year, description and data source

|                                                                          | Year       | Description                                                                                                                        | Data source                                                        |
|--------------------------------------------------------------------------|------------|------------------------------------------------------------------------------------------------------------------------------------|--------------------------------------------------------------------|
| <b>Demographic</b>                                                       |            |                                                                                                                                    |                                                                    |
| <i>Number of children below age 6/1000 inh.</i>                          | 2019       | Sum of children below age 3 and between age 3 and 5 normalized to neighbourhood population                                         | Office for Statistics, Urban Research and Elections, City of Essen |
| <i>Number of children and adolescents between age 6 and 19/1000 inh.</i> | 2019       | Sum of children between age 6 and 10, 10 and 14, 15 and 17, 18 and 19 normalized to neighbourhood population                       | Office for Statistics, Urban Research and Elections, City of Essen |
| <i>Number of elderly above age 70/1000 inh.</i>                          | 2019       | Sum of persons between age 70 and 74, 75 and 79, and above 80 normalized to neighbourhood population                               | Office for Statistics, Urban Research and Elections, City of Essen |
| <i>Average age</i>                                                       | 2019       | Average age of all inhabitants in a neighbourhood                                                                                  | Office for Statistics, Urban Research and Elections, City of Essen |
| <i>Population density (inh./km<sup>2</sup>)</i>                          | 2020       | Number of inhabitants divided by the area of a neighbourhood                                                                       | Office for Statistics, Urban Research and Elections, City of Essen |
| <i>Proportion of households with children (%)</i>                        | 2020       | Number of households with children divided by the number of all households in a neighbourhood                                      | Office for Statistics, Urban Research and Elections, City of Essen |
| <i>Average household size</i>                                            | 2019       | Number of inhabitants divided by the number of households in a neighbourhood                                                       | Office for Statistics, Urban Research and Elections, City of Essen |
| <b>Socio-economic</b>                                                    |            |                                                                                                                                    |                                                                    |
| <i>Number of persons without German nationality/1000 inh.</i>            | 2019       | Number of persons without German nationality normalized to neighbourhood population                                                | Office for Statistics, Urban Research and Elections, City of Essen |
| <i>Number of welfare recipients/1000 inh.</i>                            | 2019       | Number of welfare recipients normalized to neighbourhood population                                                                | Office for Statistics, Urban Research and Elections, City of Essen |
| <i>Number of unemployed persons/1000 inh.</i>                            | 2019       | Number of unemployed persons normalized to neighbourhood population                                                                | Office for Statistics, Urban Research and Elections, City of Essen |
| <b>Built environment</b>                                                 |            |                                                                                                                                    |                                                                    |
| <i>Residential area (%)</i>                                              | 2019       | Proportion of the area of all residential buildings                                                                                | Ruhr Regional Association                                          |
| <i>Residential area with multi-storey buildings (%)</i>                  | 2019       | Proportion of the area of all residential buildings higher than three floors                                                       | Ruhr Regional Association                                          |
| <i>Commercial area (%)</i>                                               | 2019       | Proportion of the area of all commercial buildings                                                                                 | Ruhr Regional Association                                          |
| <i>Green space (%)</i>                                                   | 2019       | Proportion of the area of public and private green spaces, including parks, open spaces near houses, meadows, pastures and forests | Ruhr Regional Association                                          |
| <i>Normalized Difference Vegetation Index (NDVI)</i>                     | 2020 (May) | Proportion of the near-infrared and visible parts of the sun radiation reflected by vegetation                                     | USGS Earth Explorer, Landsat 8                                     |
| <i>Rooms per person</i>                                                  | 2020       | Ratio of the number of rooms and the number of persons in an area                                                                  | Office for Statistics, Urban Research and Elections, City of Essen |
| <i>Living space (m<sup>2</sup>) per person</i>                           | 2020       | Ratio of the living space in square meters and the number of persons in an area                                                    | Office for Statistics, Urban Research and Elections, City of Essen |

Supplementary material:  
*Associations between built environment factors and SARS-CoV-2 infections at the neighbourhood-level in a metropolitan area in Germany*

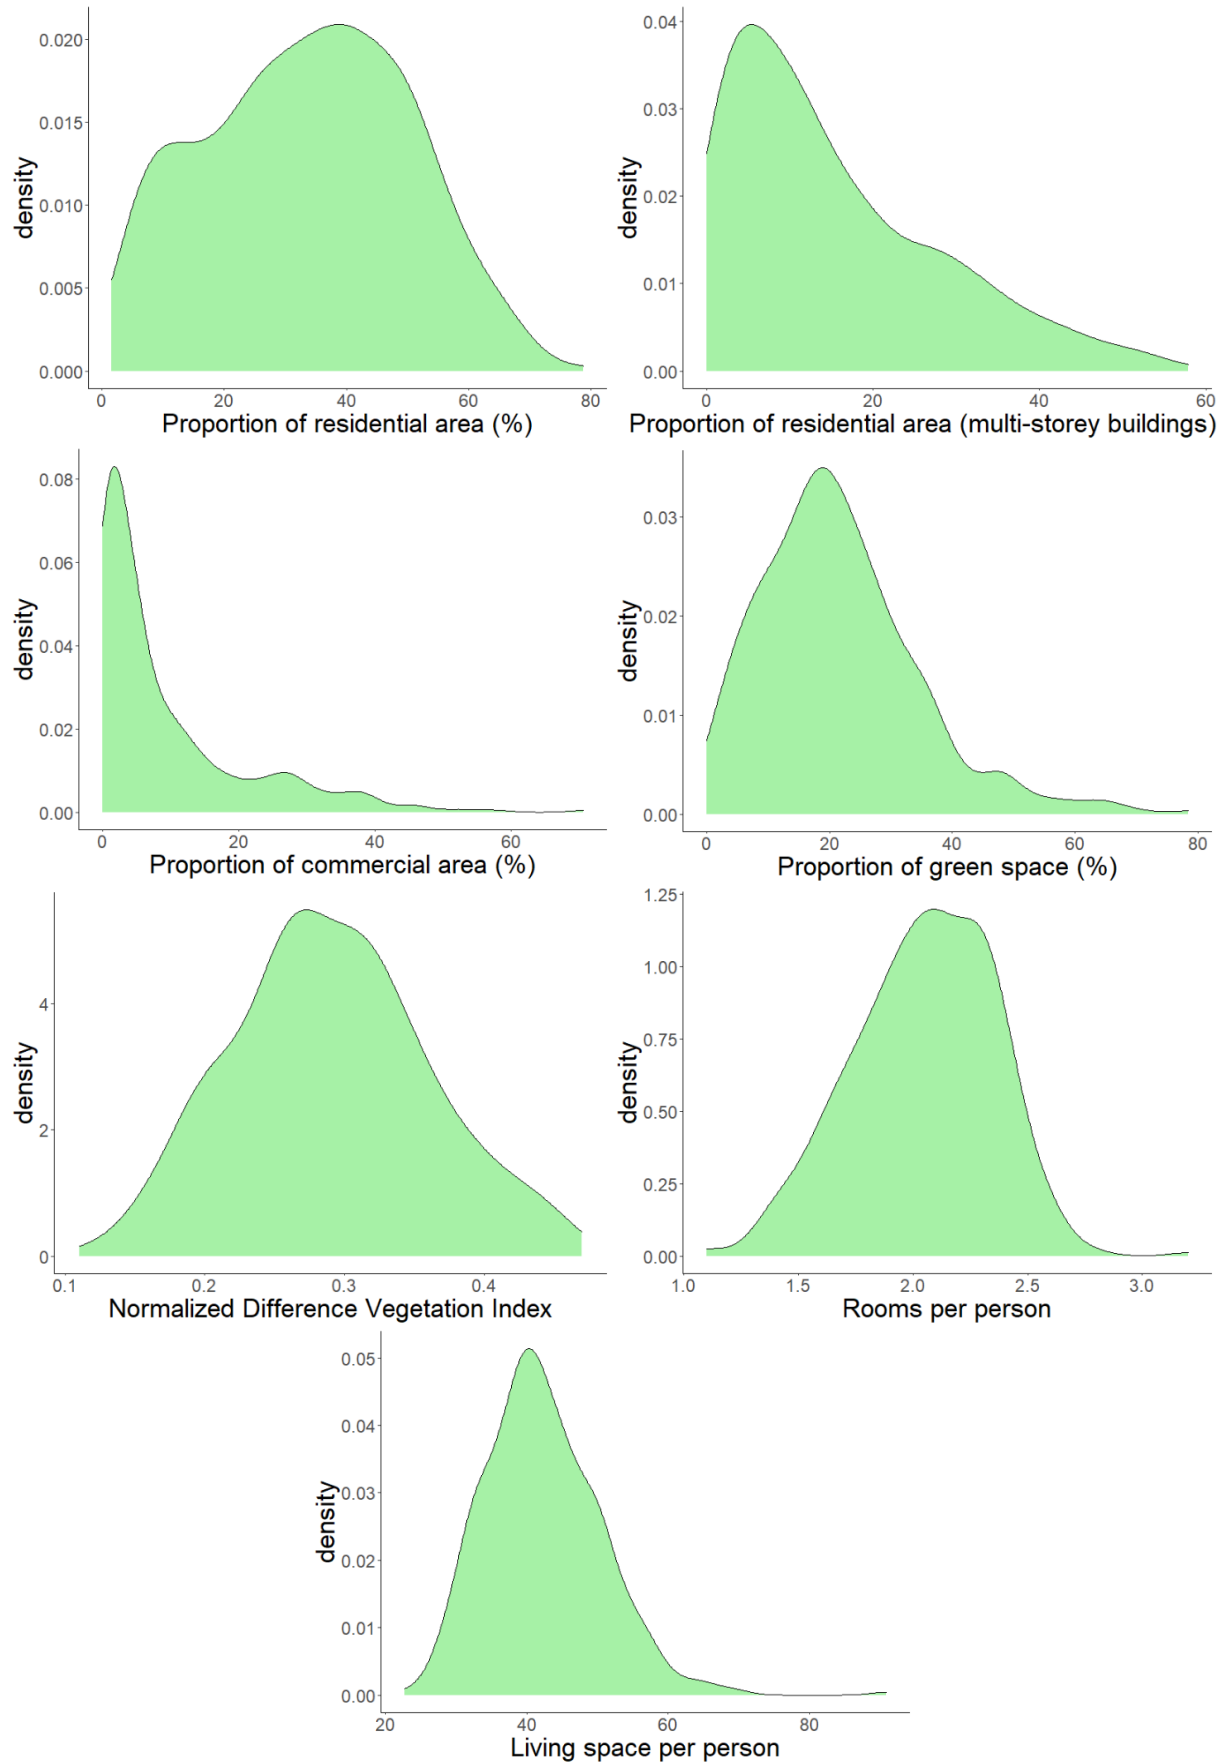

**Figure B.** Density plots of built environment factors used in the statistical analysis

Supplementary material:  
*Associations between built environment factors and SARS-CoV-2 infections at the  
neighbourhood-level in a metropolitan area in Germany*

**Table B.** Global Moran's I of all built environment factors and cumulative SARS-CoV-2 infections at neighbourhood level (n=426)

|                                                  | <i>Moran's I<br/>statistic</i> | <i>p-value</i> |
|--------------------------------------------------|--------------------------------|----------------|
| <i>Small-scale built environment</i>             |                                |                |
| Residential area (%)                             | 0.32                           | <.001          |
| Residential area with multi-storey buildings (%) | 0.37                           | <.001          |
| Commercial area (%)                              | 0.42                           | <.001          |
| Green space (%)                                  | 0.44                           | <.001          |
| Normalized Difference Vegetation Index (NDVI)    | 0.57                           | <.001          |
| Rooms per person                                 | 0.47                           | <.001          |
| Living space per person                          | 0.65                           | <.001          |
| <i>Outcome</i>                                   |                                |                |
| Cumulative SARS-CoV-2 infections/1000 inh.       | 0.17                           | <.001          |

Supplementary material:  
Associations between built environment factors and SARS-CoV-2 infections at the neighbourhood-level in a metropolitan area in Germany

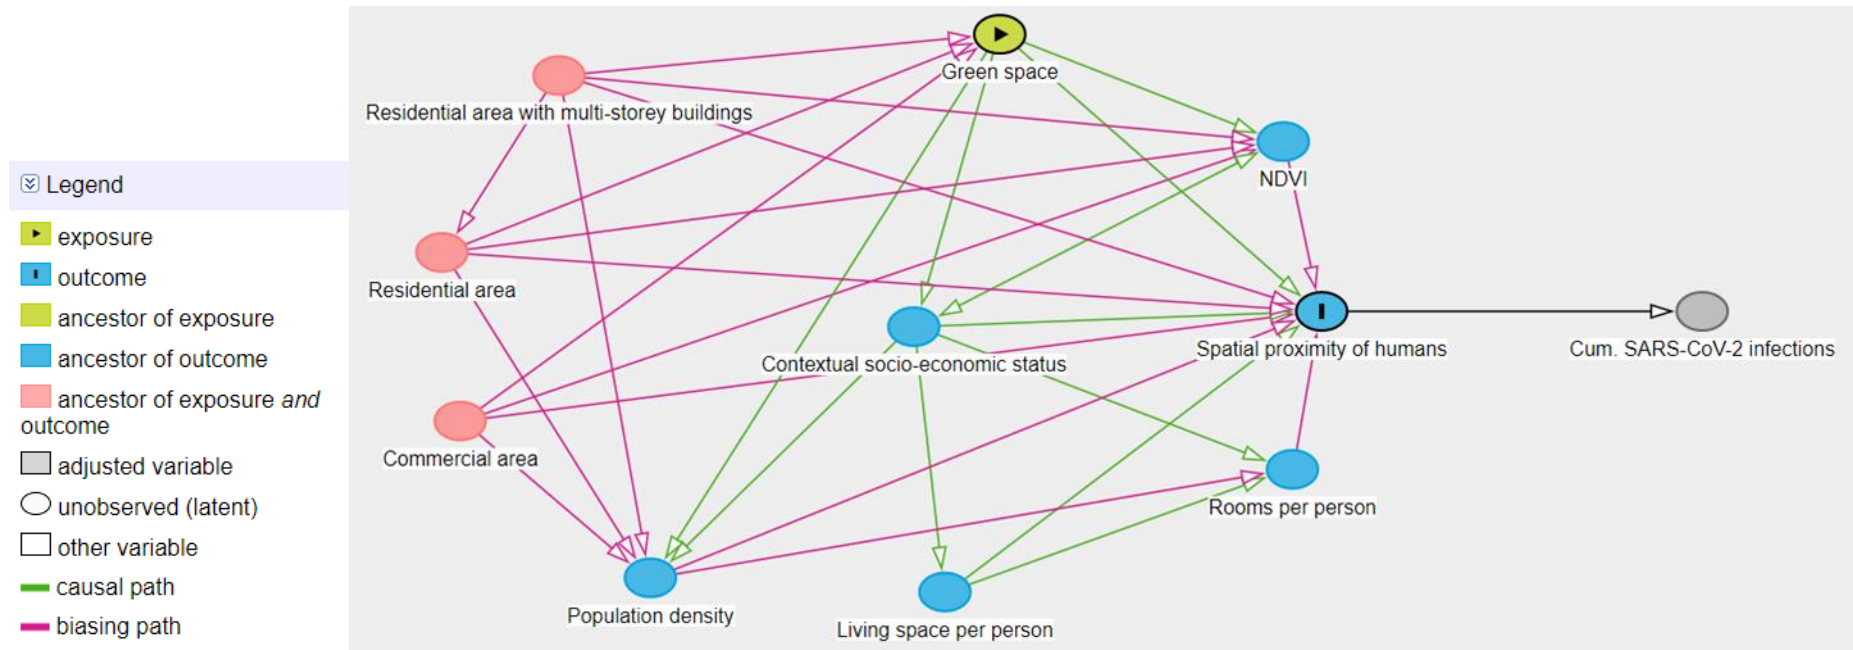

Note: Arrows between boxes were conceptualized as “X influences the probability of the occurrence of Y”.

**Figure C.** Directed acyclic graph (DAG) to derive the minimal sufficient adjustment sets for the expositions in the multivariate analysis, using the example of green space (drawn in <http://www.dagitty.net/>, developed by Textor et al. (2016)<sup>1</sup>)

<sup>1</sup> Textor, J., van der Zander, B., Gilthorpe, M. S., Liśkiewicz, M., Ellison, G. TH (2016): Robust causal inference using directed acyclic graphs: the R package ‘dagitty’. International Journal of Epidemiology, Volume 45, Issue 6, December 2016, Pages 1887–1894, <https://doi.org/10.1093/ije/dyw341>

Supplementary material:  
*Associations between built environment factors and SARS-CoV-2 infections at the  
neighbourhood-level in a metropolitan area in Germany*

**Table C.** Crude effects of built environment factors on cumulative SARS-CoV-2 infections in neighbourhoods in Essen (n=426) estimated via ordinary least squares (OLS) regression models and Moran's I of the regression residuals

|                                                     | $\beta$ | 95% CI        | Std.<br>Err. | Adj. R <sup>2</sup> | Moran's I<br>(p-value) |
|-----------------------------------------------------|---------|---------------|--------------|---------------------|------------------------|
| Residential area (%)                                | -0.02   | -0.07;0.02    | 0.02         | -0.0004             | 0.17 (<.001)           |
| Residential area with<br>multi-storey buildings (%) | 0.07    | 0.01;0.12     | 0.03         | 0.009               | 0.16 (<.001)           |
| Commercial area (%)                                 | 0.02    | -0.04;0.09    | 0.03         | -0.001              | 0.17 (<.001)           |
| Green space (%)                                     | -0.08   | -0.14;-0.03   | 0.03         | 0.02                | 0.14 (<.001)           |
| Normalized Difference<br>Vegetation Index (NDVI)    | -22.27  | -32.51;-12.03 | 5.21         | 0.04                | 0.13 (<.001)           |
| Rooms per person                                    | -12.73  | -14.79;-10.66 | 2.18         | 0.26                | 0.02 (0.25)            |
| Living space per person                             | -0.48   | -0.56;-0.41   | 0.04         | 0.27                | 0.02 (0.16)            |

Supplementary material:  
*Associations between built environment factors and SARS-CoV-2 infections at the  
neighbourhood-level in a metropolitan area in Germany*

**Table D.** Crude associations between built environment factors and cumulative SARS-CoV-2 infections in neighbourhoods in Essen (n=426) estimated via geographically weighted regression (GWR) models

|                                                     | Min    | Q1     | Median | Q3     | Max    | Adaptive<br>quantile<br>(no. of data<br>points) | Quasi-<br>global<br>R <sup>2</sup> |
|-----------------------------------------------------|--------|--------|--------|--------|--------|-------------------------------------------------|------------------------------------|
| Residential area (%)                                | -0.26  | -0.05  | -0.02  | 0.03   | 0.09   | 0.04 (18)                                       | 0.24                               |
| Residential area with<br>multi-storey buildings (%) | -0.18  | -0.007 | 0.05   | 0.09   | 0.15   | 0.06 (27)                                       | 0.21                               |
| Commercial area (%)                                 | -0.12  | -0.05  | 0.01   | 0.05   | 0.22   | 0.07 (29)                                       | 0.18                               |
| Green space (%)                                     | -0.21  | -0.07  | -0.03  | -0.007 | 0.10   | 0.06 (26)                                       | 0.19                               |
| Normalized Difference<br>Vegetation Index (NDVI)    | -48.57 | -24.47 | -13.68 | -1.47  | 6.23   | 0.07 (28)                                       | 0.20                               |
| Rooms per person                                    | -12.91 | -12.71 | -12.57 | -12.50 | -12.36 | 0.44 (189)                                      | 0.26                               |
| Living space per person                             | -0.60  | -0.55  | -0.52  | -0.48  | -0.42  | 0.23 (100)                                      | 0.28                               |



Supplementary material:  
Associations between built environment factors and SARS-CoV-2 infections at the  
neighbourhood-level in a metropolitan area in Germany

**Table E.** Overview of minimal sufficient adjustment sets based on the available data for the spatial regression models of each exposition derived the DAGs  
(highlighted in **red** are variables, which were removed during the adjustment process due to a variance inflation factor (VIF) >5)

| Exposition // Variables                                 | Residential area (%) | Residential area with multi-storey buildings (%) | Commercial area (%) | Green space (%) | NDVI | Rooms per person | Living space (m <sup>2</sup> ) per person | Population density | Welfare recipients (contextual socio-economic status) |
|---------------------------------------------------------|----------------------|--------------------------------------------------|---------------------|-----------------|------|------------------|-------------------------------------------|--------------------|-------------------------------------------------------|
| <b>Residential area (%)</b>                             | NA                   | x                                                | x                   | x               | x    |                  |                                           | x                  | x                                                     |
| <b>Residential area with multi-storey buildings (%)</b> | x                    | NA                                               | x                   | x               | x    |                  |                                           | <b>x</b>           | x                                                     |
| <b>Commercial area (%)</b>                              | x                    | x                                                | NA                  | x               | x    |                  |                                           | x                  | x                                                     |
| <b>Green space (%)</b>                                  | x                    | x                                                | x                   | NA              | x    |                  |                                           | x                  | x                                                     |
| <b>NDVI</b>                                             | x                    | x                                                | x                   | x               | NA   |                  |                                           |                    | x                                                     |
| <b>Rooms per person</b>                                 |                      |                                                  |                     |                 |      | NA               | <b>x</b>                                  | x                  | x                                                     |
| <b>Living space (m<sup>2</sup>) per person</b>          |                      |                                                  |                     |                 |      | <b>x</b>         | NA                                        | x                  | x                                                     |

**Table F.** Demographic and socio-economic characteristics across all neighbourhoods (median and IQR) and stratified into three groups based on the cumulative number of SARS-CoV-2 infections up to 31.05.2021 in Essen

|                                                                   | Cumulative SARS-CoV-2 infections/1000 inh. |                           |                            |                            |
|-------------------------------------------------------------------|--------------------------------------------|---------------------------|----------------------------|----------------------------|
|                                                                   | All<br>(n=426)                             | <9<br>(n=138)             | 9-<14.5<br>(n=143)         | ≥14.5<br>(n=145)           |
| <i>Demographic</i>                                                | Median [Q1;Q3]                             |                           |                            |                            |
| Number of children below age 6/1000 inh.                          | 54.3<br>[46.6;64.0]                        | 50.8<br>[43.7;62.2]       | 52.8<br>[45.7;62.2]        | 61.4<br>[52.0;76.1]        |
| Number of children and adolescents between age 6 and 19/1000 inh. | 116.3<br>[98.6;139.2]                      | 104.5<br>[93.0;123.6]     | 114.3<br>[98.1;134.9]      | 130.8<br>[108.5;166.5]     |
| Number of elderly above age 70/1000 inh.                          | 154.9<br>[113.0;200.4]                     | 180.4<br>[150.2;225.8]    | 148.5<br>[115.3;192.0]     | 128.1<br>[90.4;179.1]      |
| Average age                                                       | 44.6<br>[40.5;48.0]                        | 47.1<br>[44.2;49.4]       | 44.3<br>[40.9;47.1]        | 41.9<br>[38.2;45.6]        |
| Population density (inh./km <sup>2</sup> )                        | 5534.8<br>[3064.2;9134.2]                  | 4294.1<br>[2039.7;6390.0] | 5987.0<br>[3077.9;10850.0] | 6627.3<br>[3725.8;10984.6] |
| Proportion of households with children (%)                        | 17.7<br>[14.7;21.2]                        | 16.7<br>[14.4;18.9]       | 16.5<br>[14.1;19.8]        | 20.0<br>[15.8;24.1]        |
| Average household size                                            | 1.9<br>[1.8;2.1]                           | 1.9<br>[1.8;2.0]          | 1.9<br>[1.7;2.0]           | 2.0<br>[1.8;2.2]           |
| <i>Socio-economic</i>                                             | Median [Q1;Q3]                             |                           |                            |                            |
| Number of persons without German nationality/1000 inh.            | 130.0<br>[65.9;238.8]                      | 71.8<br>[44.9;117.4]      | 139.1<br>[75.0;219.9]      | 214.2<br>[131.2;317.4]     |
| Number of welfare recipients/1000 inh.                            | 145.9<br>[55.8;252.8]                      | 60.3<br>[27.3;126.0]      | 136.2<br>[61.8;243.1]      | 240.1<br>[159.7;360.5]     |
| Number of unemployed persons/1000 inh.                            | 42.7<br>[19.5;70.2]                        | 20.4<br>[13.7;39.8]       | 42.1<br>[22.2;67.4]        | 65.5<br>[43.4;91.2]        |

Supplementary material:  
Associations between built environment factors and SARS-CoV-2 infections at the  
neighbourhood-level in a metropolitan area in Germany

**Table G.** Crude associations between demographic and socio-economic variables and cumulative SARS-CoV-2 infections in neighbourhoods in Essen (n=426) estimated via ordinary least squares (OLS) regression models and Moran's I of the regression residuals

|                                                                   | $\beta$ | 95% CI         | Std. Err. | Adj. R <sup>2</sup> | Moran's I<br>(p-value) |
|-------------------------------------------------------------------|---------|----------------|-----------|---------------------|------------------------|
| <i>Demographic</i>                                                |         |                |           |                     |                        |
| Number of children below age 6/1000 inh.                          | 0.13    | 0.09;0.17      | 0.02      | 0.07                | 0.10 (<.001)           |
| Number of children and adolescents between age 6 and 19/1000 inh. | 0.07    | 0.05;0.09      | 0.01      | 0.11                | 0.10 (<.001)           |
| Number of elderly above age 70/1000 inh.                          | -0.02   | -0.04;-0.01)   | 0.005     | 0.03                | 0.10 (<.001)           |
| Average age                                                       | -0.48   | -0.63;-0.34)   | 0.07      | 0.09                | 0.08 (<.01)            |
| Population density (inh./km <sup>2</sup> )                        | 0.0002  | 0.00008;0.0004 | 0.00007   | 0.02                | 0.16 (<.001)           |
| Proportion of households with children (%)                        | 0.40    | 0.27;0.53      | 0.07      | 0.08                | 0.14 (<.001)           |
| Average household size                                            | 9.20    | 6.41;12.0      | 1.42      | 0.09                | 0.19 (<.001)           |
| <i>Socio-economic</i>                                             |         |                |           |                     |                        |
| Number of persons without German nationality/1000 inh.            | 0.02    | 0.02;0.03      | 0.003     | 0.15                | 0.07 (<.01)            |
| Number of welfare recipients/1000 inh.                            | 0.02    | 0.02;0.03      | 0.002     | 0.19                | 0.01 (0.26)            |
| Number of unemployed persons/1000 inh.                            | 0.10    | 0.08;0.12      | 0.01      | 0.17                | 0.02 (0.20)            |

Supplementary material:  
Associations between built environment factors and SARS-CoV-2 infections at the  
neighbourhood-level in a metropolitan area in Germany

**Table H.** Crude associations between demographic and socio-economic variables and cumulative SARS-CoV-2 infections in neighbourhoods in Essen (n=426) estimated via mixed spatial lag regression models (SLM)

|                                                                   | $\beta$ | 95% CI          | Std. Err. | Pseudo R <sup>2</sup> |
|-------------------------------------------------------------------|---------|-----------------|-----------|-----------------------|
| <i>Demographic</i>                                                |         |                 |           |                       |
| Number of children below age 6/1000 inh.                          | 0.08    | 0.03;0.13       | 0.02      | 0.13                  |
| Number of children and adolescents between age 6 and 19/1000 inh. | 0.06    | 0.03;0.08       | 0.01      | 0.14                  |
| Number of elderly above age 70/1000 inh.                          | 0.004   | -0.01;0.02      | 0.007     | 0.12                  |
| Average age                                                       | -0.24   | -0.43;-0.05)    | 0.10      | 0.13                  |
| Population density (inh./km <sup>2</sup> )                        | 0.0002  | -0.00001;0.0004 | 0.0001    | 0.07                  |
| Proportion of households with children (%)                        | 0.37    | 0.21;0.52       | 0.08      | 0.12                  |
| Average household size                                            | 11.79   | 8.63;14.95      | 1.61      | 0.17                  |
| <i>Socio-economic</i>                                             |         |                 |           |                       |
| Number of persons without German nationality/1000 inh.            | 0.02    | 0.01;0.03       | 0.004     | 0.16                  |
| Number of welfare recipients/1000 inh.                            | 0.02    | 0.01;0.03       | 0.003     | 0.20                  |
| Number of unemployed persons/1000 inh.                            | 0.07    | 0.04;0.10       | 0.02      | 0.18                  |

Supplementary material:  
*Associations between built environment factors and SARS-CoV-2 infections at the  
 neighbourhood-level in a metropolitan area in Germany*

**Table I.** Crude associations between green space components and cumulative SARS-CoV-2 infections in neighbourhoods in Essen (n=426) estimated via mixed spatial lag regression models (SLM)

|                                               | $\beta$ | 95% CI      | Std. Err. | Pseudo R <sup>2</sup> |
|-----------------------------------------------|---------|-------------|-----------|-----------------------|
| Public and private green spaces and parks (%) | 0.08    | 0.00;0.16   | 0.04      | 0.10                  |
| Open spaces near houses (%)                   | -0.18   | -0.31;-0.05 | 0.07      | 0.09                  |
| Meadows and pastures (%)                      | 0.006   | -0.20;0.21  | 0.10      | 0.09                  |
| Forest (%)                                    | -0.05   | -0.16;0.05  | 0.05      | 0.09                  |
